# Supplementary material for: Hollow calcite rhombohedra at ionic liquid-stabilized bubbles
Source: Royal Society of Chemistry journal article supplement (doi:10.1039/c2ce25975c), 2012-01-01
Supplement: c2ce25975c.pdf [file c2ce25975c.pdf]

## Electronic Supplementary Information

### Hollow calcite rhombohedra at ionic liquid-stabilized bubbles

Magdalena Kowacz<sup>a,\*</sup>, José N. Canongia Lopes<sup>a,b</sup>, José M. S. S. Esperança<sup>a</sup> and Luís Paulo N. Rebelo<sup>a,\*</sup>

<sup>a</sup> Instituto de Tecnologia Química e Biológica, [www.itqb.unl.pt](http://www.itqb.unl.pt), Universidade Nova de Lisboa, Av. da República, 2780-157 Oeiras, Portugal. Fax: +351 - 21 4411 277; Tel: +351 - 21 4469 413 / 441; \* E-mail: [magda@itqb.unl.pt](mailto:magda@itqb.unl.pt); [luis.rebelo@itqb.unl.pt](mailto:luis.rebelo@itqb.unl.pt)

<sup>b</sup> Centro de Química Estrutura, Complexo I, Instituto Superior Técnico, Av. Rovisco Pais, 1049-001 Lisboa, Portugal. Fax: +351 - 218464455; Tel: +351 - 218419261

#### Crystallization experiments

The crystallization of CaCO<sub>3</sub> was induced by mixing equally concentrated solutions of Na<sub>2</sub>CO<sub>3</sub> and CaCl<sub>2</sub> in the presence of an ionic liquid (IL): 1.0 ml of a 0.1 M solution of a given IL was mixed with 400 µl of a 0.01 M solution of Na<sub>2</sub>CO<sub>3</sub> and subsequently 400 µl of a 0.01 M solution of CaCl<sub>2</sub> were added. Prior to the addition of the CaCl<sub>2</sub>, the mixture (Na<sub>2</sub>CO<sub>3</sub> plus IL) was vigorously shaken in a sealed reaction vessel, until turbidity revealed the generation of air bubbles. The aqueous CaCl<sub>2</sub> solution was immediately injected into the fresh mixture. In a parallel set of experiments the IL-Na<sub>2</sub>CO<sub>3</sub> mixture was allowed to settle before adding the CaCl<sub>2</sub>. The aliquots of the reacting mixtures were filtered by a 0.2 µm pore diameter membrane filter immediately after the reaction had been induced and, in some cases, after specific periods of time (between 7 and 30 days). The filters were washed by Milli-Q water, air-dried, gold coated and analyzed with scanning electron microscopy (SEM).

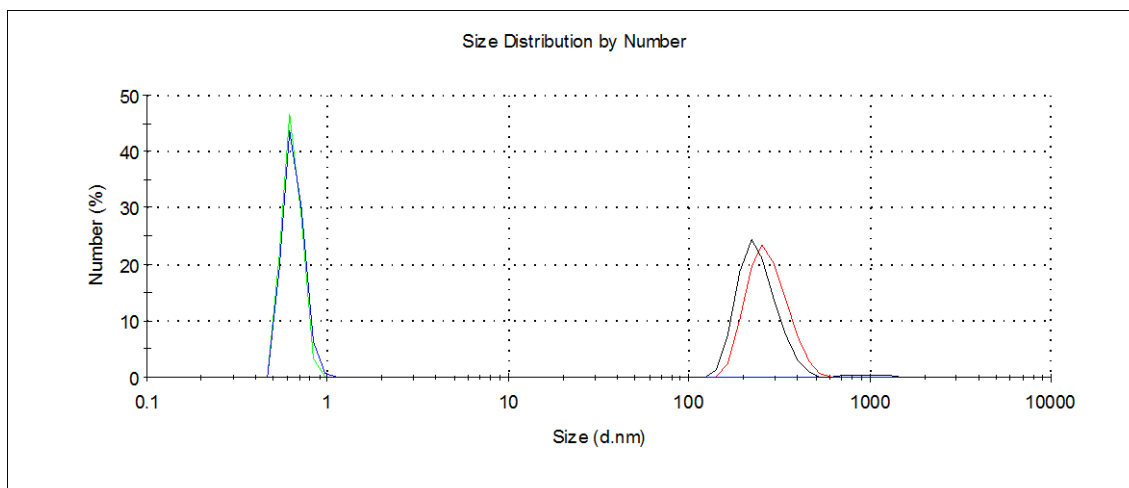

Figure S1. Representative results of dynamic light scattering (DLS) experiments showing particle size distribution in non-shaken (light green- [EMIM][C<sub>2</sub>SO<sub>3</sub>] + Na<sub>2</sub>CO<sub>3</sub>; blue - [Ch][C<sub>1</sub>SO<sub>3</sub>] + Na<sub>2</sub>CO<sub>3</sub> + CaCl<sub>2</sub>) and shaken systems (black - [EMIM][C<sub>2</sub>SO<sub>3</sub>] + Na<sub>2</sub>CO<sub>3</sub>; red – Milli-Q water). The size of the particles (0.6 nm) that could be detected in pure IL solutions and in IL+ salt(s) systems without air bubble generation corresponds approximately to the size of the bulky IL ions. Manual shaking of the pure IL or IL+ Na<sub>2</sub>CO<sub>3</sub> mixture resulted in the formation of particles (air bubbles) with sizes similar to those of air bubbles generated in Milli-Q water. In all cases, [IL] = 60 mM, [CaCl<sub>2</sub>]=[Na<sub>2</sub>CO<sub>3</sub>] = 2 mM. Results of separate measurements are superimposed on the image.

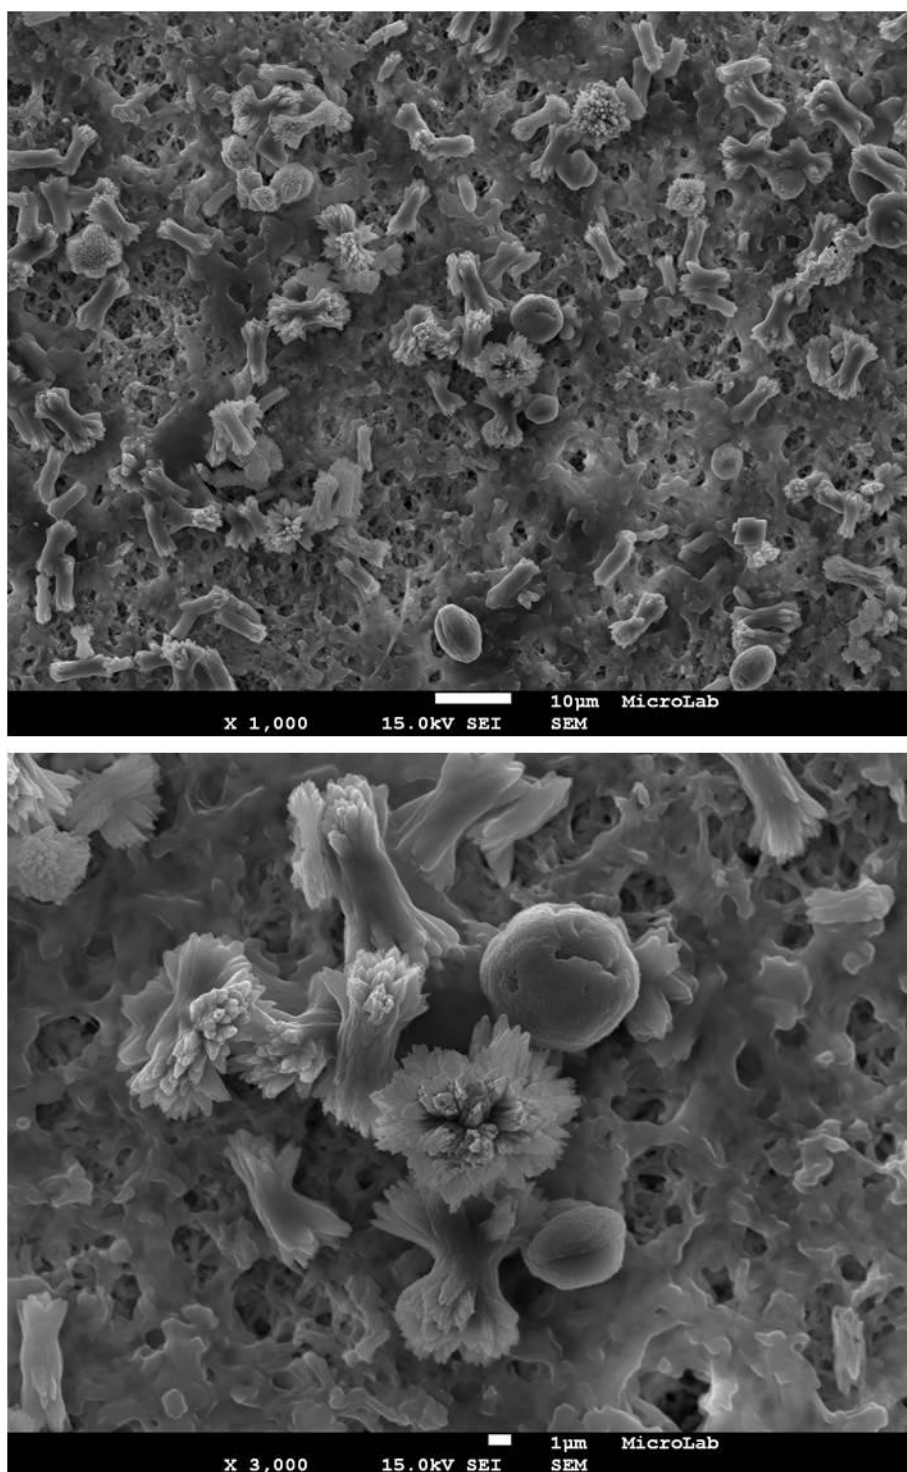

Figure S2. SEM image presenting CaCO<sub>3</sub> particles generated in solution shaken for 3 minutes in the course of the crystallization process (after mixing [EMIM] [C<sub>2</sub>SO<sub>3</sub>]= 60 mM and [CaCl<sub>2</sub>]=[Na<sub>2</sub>CO<sub>3</sub>] = 2 mM) . Bunches of predominantly needle-shaped crystals, corresponding to the morphology of aragonite, can be observed.
